# Supplementary material for: Dynamic topomerization of Cu(i)-complexed pseudorotaxanes
Source: Royal Society of Chemistry journal article supplement (doi:10.1039/c2cc37724a), 2012-11-29

## Electronic Supporting Information

### Dynamic topomerization of Cu(I)-complexed pseudorotaxanes

Meera Mohankumar,<sup>a</sup> Michel Holler,<sup>a</sup> Michel Schmitt,<sup>b</sup>  
Jean-Pierre Sauvage<sup>\*c</sup> and Jean-François Nierengarten<sup>\*a</sup>

<sup>a</sup> *Laboratoire de Chimie des Matériaux Moléculaires, Université de Strasbourg et CNRS (UMR 7509), Ecole Européenne de Chimie, Polymères et Matériaux, 25 rue Becquerel, 67087 Strasbourg Cedex 2, France. E-mail: [nierengarten@unistra.fr](mailto:nierengarten@unistra.fr)*

<sup>b</sup> *Service de RMN, Université de Strasbourg et CNRS (UMR 7509), Ecole Européenne de Chimie, Polymères et Matériaux, 25 rue Becquerel, 67087 Strasbourg Cedex 2, France.*

<sup>c</sup> *Institut de Science et d'Ingénierie Supramoléculaires (ISIS), Université de Strasbourg et CNRS, 8 allée Gaspard Monge, 67000 Strasbourg, France. E-mail: [jpsauvage@unistra.fr](mailto:jpsauvage@unistra.fr)*

### Preparation of m30

The synthesis of macrocycle **m30** is depicted in Scheme S1. Compound **2** was prepared in three steps from ethylene glycol according to a reported procedure.<sup>1</sup> Phenanthroline **3** was obtained in 41% yield from the reaction of the dicarbanion derived from neocuproine (**1**) with bromide **2** in THF. The macrocyclization was then performed under ring closing metathesis reaction conditions using the first generation Grubbs' catalyst. Macrocycle **4** was thus prepared in a remarkable 86% isolated yield. Close inspection of the <sup>1</sup>H NMR of **4** revealed that this compound was obtained as an *E/Z* isomeric mixture, one isomer being largely major (*ca.* 90%). Finally, hydrogenation of the carbon-carbon double bond was carried out using Pd/C.

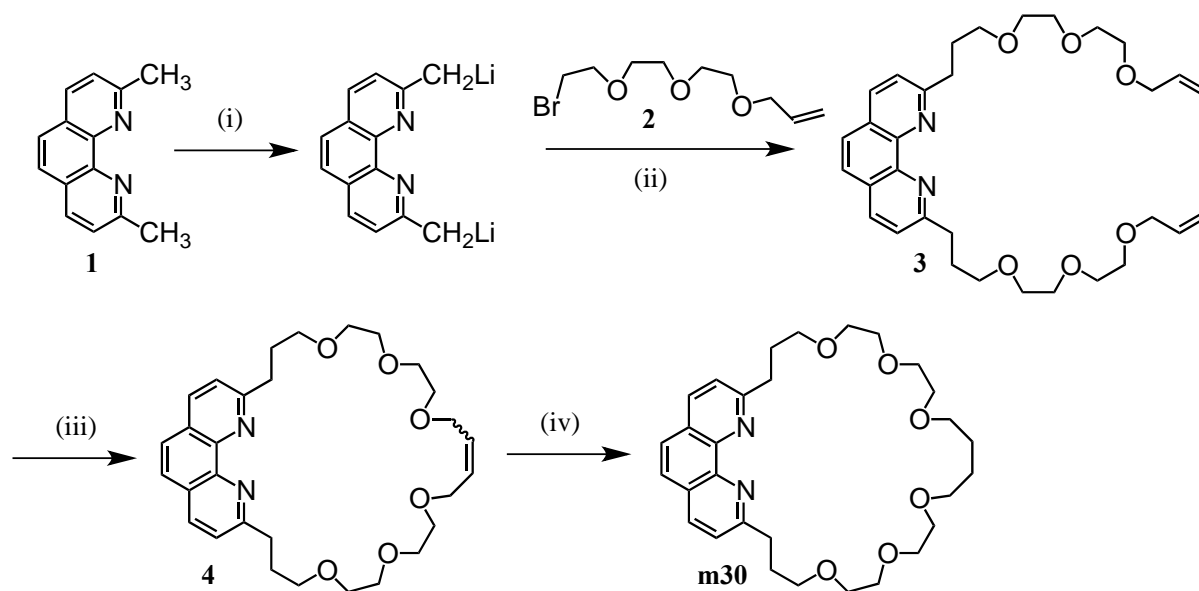

**Scheme S1.** Reagents and conditions: (i) LDA, THF, (ii) **2**, THF (41%); (iii) first generation Grubbs' catalysts, CH<sub>2</sub>Cl<sub>2</sub> (86%); (iv) H<sub>2</sub>, Pd/C, THF (60%).

<sup>1</sup> M. Gonçalves, K. Estieu-Gionnet, T. Berthelot, G. Lain, M. Bayle, X. Cannon, N. Betz, A. Bikfalvi and G. Déléris, *Pharm Res.*, 2005, **8**, 1411.

## Experimental section

**General.** Acetonitrile (CH<sub>3</sub>CN) was distilled over CaH<sub>2</sub> under Ar. Dichloromethane (CH<sub>2</sub>Cl<sub>2</sub>) was distilled over CaH<sub>2</sub> under Ar. All reactions were performed in standard glassware under an inert Ar atmosphere. Evaporation and concentration were done at water aspirator pressure and drying in vacuo at 10<sup>-2</sup> Torr. Column chromatography: silica gel 60 (230-400 mesh, 0.040-0.063 mm) was purchased from E. Merck. Thin Layer Chromatography (TLC) was performed on aluminum sheets coated with silica gel 60 F<sub>254</sub> purchased from E. Merck. IR spectra (cm<sup>-1</sup>) were recorded on a Perkin–Elmer Spectrum One Spectrophotometer. NMR spectra were recorded on a Bruker AC 300 or AC 400 with solvent peaks as reference. The <sup>1</sup>H signals were assigned by 2D experiments (COSY and ROESY). MALDI-TOF-mass spectra were carried out on a Bruker BIFLEX<sup>TM</sup> matrix-assisted laser desorption time-of-flight mass spectrometer. ESI-MS mass spectra were carried out on a Bruker MicroTOF spectrometer.

### Compound 3.

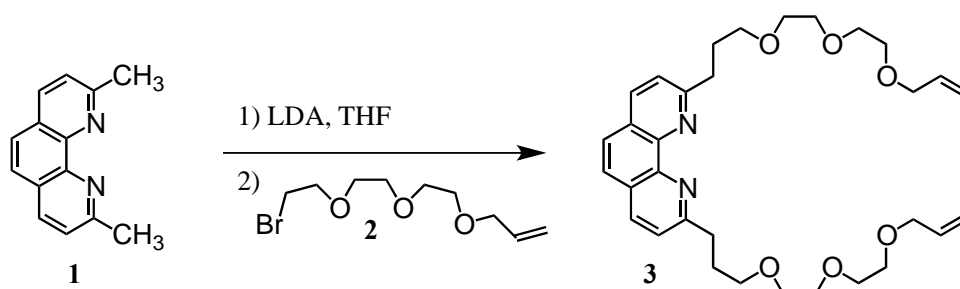

A 2 M solution of LDA in THF (9 mL, 18 mmol) was added slowly to a stirred solution of **1** (1.87 g, 8.97 mmol) in anhydrous THF (50 mL) at -78 °C under Ar. After 4 h, a solution of **2** (5.0 g, 19.75 mmol) in THF (10 mL) was added dropwise. The resulting mixture was stirred for 2 h at -78°C, then for 16 h at room temperature. The solution was then poured into ice water (150 mL). The mixture was extracted with CH<sub>2</sub>Cl<sub>2</sub> (3 x 100 mL) and the combined organic layers were dried (MgSO<sub>4</sub>), filtered and evaporated. Column chromatography (SiO<sub>2</sub>, CH<sub>2</sub>Cl<sub>2</sub>/1 to 2% MeOH) gave **3** (2.02 g, 41% yield) as a pale yellow glassy product. <sup>1</sup>H NMR (CD<sub>2</sub>Cl<sub>2</sub>, 400 MHz): 8.15 (d, *J* = 7 Hz, 2H), 7.72 (s, 2H), 7.54 (d, *J* = 7 Hz, 2H), 5.91 (m, 2H), 5.29-5.13 (m, 4H), 3.99-3.97 (m, 4H), 3.63-3.55 (m, 20H), 3.20 (m, 4H), 2.17 (m, 4H). <sup>13</sup>C {<sup>1</sup>H} NMR (CD<sub>2</sub>Cl<sub>2</sub>, 75 MHz): 163.0, 146.4, 136.9, 135.9, 127.9, 126.3, 123.4, 117.1, 72.8, 71.45, 71.4, 71.35, 71.1, 70.4, 36.6, 30.9. MALDI-TOF MS: 553.12 (MH<sup>+</sup>, calcd for

$C_{32}H_{45}N_2O_6$ : 553.33). Anal. Calcd. for  $C_{32}H_{44}N_2O_6$ : C, 69.54; H, 8.02; N, 5.07. Found: C, 69.67; H, 7.96; N, 4.97.

#### Compound 4.

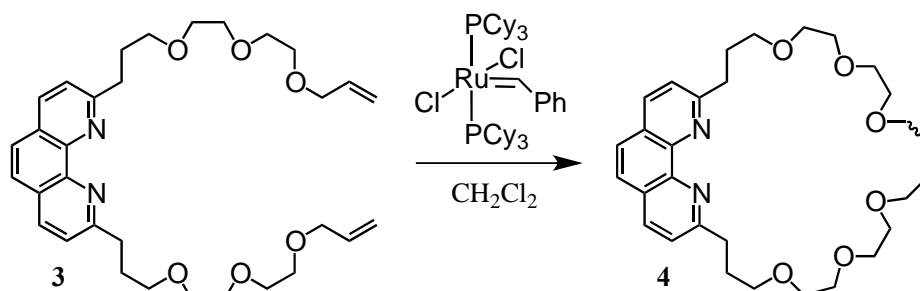

Grubb's 1<sup>st</sup> generation catalyst (5 mol%) was added to a 0.01M solution of **3** (600 mg, 1.09 mmol) in  $CH_2Cl_2$ . After 6h at room temperature, an additional portion of catalyst (5 mol%) was added. After 6 h, the solvent was removed under vacuum. Column chromatography on  $SiO_2$  ( $CH_2Cl_2$ /1 to 3% MeOH) gave **4** (490 mg, 86% yield) as a pale yellow glassy product that was used as received in the next step.  $^1H$  NMR ( $CDCl_3$ , 300 MHz): 8.12 (d,  $J = 7$  Hz, 2H), 7.68 (s, 2H), 7.49 (d,  $J = 7$  Hz, 2H), 5.79 (m, 2H), 4.02 (m, 4H), 3.70-3.55 (m, 20H), 3.26 (m, 4H), 2.24 (m, 4H). MALDI-TOF MS: 525.11 ( $MH^+$ , calcd for  $C_{30}H_{41}N_2O_6$ : 525.29).

#### Compound m30.

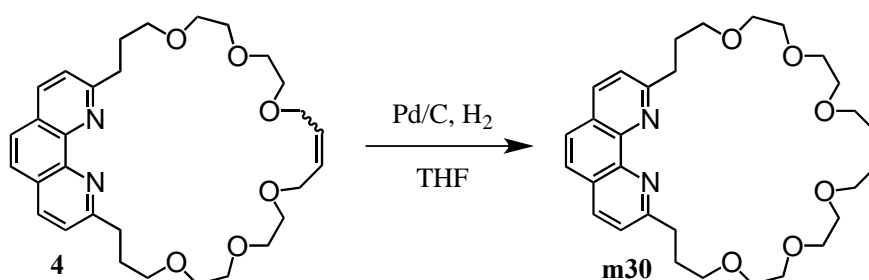

A mixture of **4** (550 mg, 1.05 mmol) and  $Pd/C$  (10 wt. % loading, 55 mg) in THF (50 mL) was stirred at room temperature under positive  $H_2$  atmosphere. After 4 h, the mixture was filtered (Celite) and evaporated. Column chromatography on  $SiO_2$  ( $CH_2Cl_2$ /1 to 3% MeOH) gave **3** (330 mg, 60% yield) as a colorless glassy product.  $^1H$  NMR ( $CD_2Cl_2$ , 300 MHz): 8.17 (d,  $J = 7$  Hz, 2H), 7.73 (s, 2H), 7.53 (d,  $J = 7$  Hz, 2H), 3.67-3.58 (m, 16H), 3.53 (m, 4H), 3.45

(m, 4H), 3.21 (m, 4H), 2.18 (m, 4H), 1.61 (m, 4H).  $^{13}\text{C}$   $\{^1\text{H}\}$  NMR ( $\text{CD}_2\text{Cl}_2$ , 75 MHz): 163.1, 146.4, 136.9, 127.9, 126.2, 123.3, 71.7, 71.6, 71.5, 71.4, 71.2, 70.9, 36.7, 30.9, 27.2. MALDI-TOF MS: 527.15 ( $\text{MH}^+$ , calcd for  $\text{C}_{30}\text{H}_{43}\text{N}_2\text{O}_6$ : 527.31). Anal. Calcd. for  $\text{C}_{30}\text{H}_{42}\text{N}_2\text{O}_6$ : C, 68.42; H, 8.04; N, 5.32. Found: C, 68.51; H, 8.22; N, 5.02.

### Preparation of pseudorotaxanes $[\text{Cu}(\mathbf{m30})(\text{PP})]\text{BF}_4$

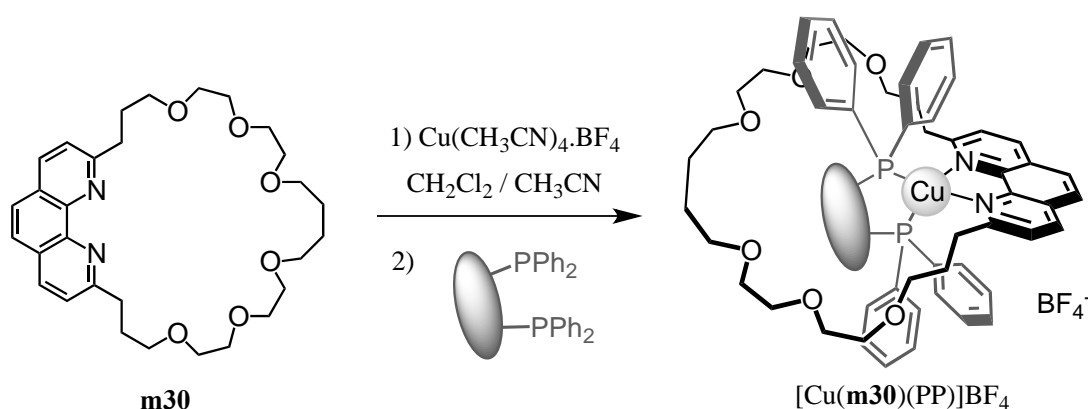

**Pseudorotaxane  $[\text{Cu}(\mathbf{m30})(\text{dppe})]\text{BF}_4$ .** A solution of **m30** (70 mg, 0.13 mmol) and  $\text{Cu}(\text{CH}_3\text{CN})_4\text{BF}_4$  (42 mg, 0.13 mmol) in  $\text{CH}_2\text{Cl}_2/\text{CH}_3\text{CN}$  (7 : 3, 10 mL) mixture was stirred for 0.5 h, then dppe (53 mg, 0.13 mmol) was added. After 1 h, the solvents were evaporated. Recrystallization by slow diffusion of  $\text{Et}_2\text{O}$  into a  $\text{CH}_2\text{Cl}_2$  solution of the crude product gave  $[\text{Cu}(\mathbf{m30})(\text{dppe})]\text{BF}_4$  (90 mg, 63%) as yellow-orange crystals (m.p.: 144-145°C).  $^1\text{H}$  NMR ( $\text{CD}_2\text{Cl}_2$ , 300 MHz): 8.57 (d,  $J = 7$  Hz, 2H), 8.09 (s, 2H), 7.68 (d,  $J = 7$  Hz, 2H), 7.30 (m, 20H), 3.54 (m, 16H), 3.25 (m, 10H), 2.82 (m, 4H), 2.48 (m, 4H), 1.72 (m, 4H), 1.39 (m, 2H).  $^{31}\text{P}$   $\{^1\text{H}\}$  NMR ( $\text{CD}_2\text{Cl}_2$ , 162 MHz): -6.87. MALDI-TOF MS: 987.2 ( $[\text{M} - \text{BF}_4]^+$ , calcd for  $\text{C}_{56}\text{H}_{66}\text{N}_2\text{P}_2\text{O}_6\text{Cu}$ : 987.37). Anal. Calcd. for  $\text{C}_{56}\text{H}_{66}\text{N}_2\text{P}_2\text{O}_6\text{CuBF}_4$ : C, 62.54; H, 6.19; N, 2.60. Found: C, 62.70; H, 6.44; N, 2.39.

**Pseudorotaxane  $[\text{Cu}(\mathbf{m30})(\text{POP})]\text{BF}_4$ .** A solution of **m30** (110 mg, 0.21 mmol) and  $\text{Cu}(\text{CH}_3\text{CN})_4\text{BF}_4$  (66 mg, 0.21 mmol) in  $\text{CH}_2\text{Cl}_2/\text{CH}_3\text{CN}$  (7:3, 10 mL) mixture was stirred for 0.5 h, then POP (113 mg, 0.21 mmol) was added. After 1 h, the solvents were evaporated. Column chromatography ( $\text{SiO}_2$ ,  $\text{CH}_2\text{Cl}_2/1\%$  MeOH) followed by recrystallization (slow diffusion of  $\text{Et}_2\text{O}$  into a  $\text{CH}_2\text{Cl}_2$  solution of the product) gave  $[\text{Cu}(\mathbf{m30})(\text{POP})]\text{BF}_4$  (191 mg,

75% yield) as yellow crystals (m.p.: 172-173°C).  $^1\text{H}$  NMR ( $\text{CD}_2\text{Cl}_2$ , 300 MHz): 8.43 (d,  $J = 7$  Hz, 2H), 7.98 (s, 2H), 7.68 (d,  $J = 7$  Hz, 2H), 7.31 (m, 6H), 7.15 (m, 8H), 7.05-6.82 (m, 14H), 3.15-3.07 (m, 20H), 2.92 (t,  $J = 6$  Hz, 4H), 2.67 (t,  $J = 6$  Hz, 4H), 1.32 (m, 8H).  $^{31}\text{P}$   $\{^1\text{H}\}$  NMR ( $\text{CD}_2\text{Cl}_2$ , 162 MHz): -13.57. ES-MS: 1127.39 ( $[\text{M} - \text{BF}_4]^+$ , calcd for  $\text{C}_{66}\text{H}_{70}\text{N}_2\text{O}_7\text{P}_2\text{Cu}$ : 1127.40). Anal. Calcd. for  $\text{C}_{66}\text{H}_{70}\text{N}_2\text{O}_7\text{P}_2\text{CuBF}_4$ : C, 65.21; H, 5.80; N, 2.30. Found: C, 64.99; H, 6.01; N, 2.24.

### X-Ray crystal structures of [Cu(m30)(dppp)]BF<sub>4</sub> and [Cu(m30)(POP)]BF<sub>4</sub>.

The resolution of both structures is only moderate, mainly because of the disorder in the flexible chain subunit of the **m30** ligand. For this reason, the bond lengths and bond angles have not been described in detail. The identity of both Cu<sup>I</sup>-complexed pseudo-rotaxanes is, however, in no doubt.

[Cu(m30)(dppe)]BF<sub>4</sub>.0.5Et<sub>2</sub>O. Crystals suitable for X-ray crystal-structure analysis were obtained by slow diffusion of Et<sub>2</sub>O into a CH<sub>2</sub>Cl<sub>2</sub> solution of [Cu(m30)(dppe)]BF<sub>4</sub>. Data were collected at 173 K on a Bruker APEX-II CCD diffractometer (Mo-K $\alpha$  radiation,  $\lambda = 0.71073$  Å). The structure was solved by direct methods (SHELXS-97) and refined against F<sup>2</sup> using the SHELXL-97 software. The non-hydrogen atoms were refined anisotropically, using weighted full-matrix least-squares on F<sup>2</sup>. The H-atoms were included in calculated positions and treated as riding atoms using SHELXL default parameters. It is noted that (i) one phenyl group is disordered on 2 positions and (ii) the residual electronic density attributed to half a molecule of unresolved Et<sub>2</sub>O solvent has been squeezed. Crystallographic data: formula: C<sub>56</sub>H<sub>66</sub>CuN<sub>2</sub>O<sub>6</sub>P<sub>2</sub>.BF<sub>4</sub>.(C<sub>4</sub>H<sub>10</sub>O)<sub>1/2</sub> (M = 1075.40 g.mol<sup>-1</sup>); yellow crystal, 0.50 × 0.25 × 0.15 mm; crystal system: triclinic, space group P-1;  $a = 11.7950(7)$  Å;  $b = 13.2034(7)$  Å;  $c = 19.7058(11)$  Å;  $\alpha = 106.642(1)^\circ$ ;  $\beta = 106.201(1)^\circ$ ;  $\gamma = 91.402(1)$ ; V = 2805.3(3) Å<sup>3</sup>; Z = 2; F(000) = 1128; a total of 36543 reflections collected; 2.24° <  $\theta$  < 28.09°, 13553 independent reflections with 8630 having I > 2 $\sigma$ (I); 553 parameters; Final results : R<sub>1</sub>(F<sup>2</sup>) = 0.0905; wR<sub>2</sub>(F<sup>2</sup>) = 0.2668, Goof = 1.102. Full data collection parameters and structural data are available as CIF file (Cambridge Crystallographic Data Centre deposition number CCDC 905751).

[Cu(m30)(POP)]BF<sub>4</sub>. Crystals suitable for X-ray crystal-structure analysis were obtained by slow diffusion of Et<sub>2</sub>O into a CH<sub>2</sub>Cl<sub>2</sub> solution of [Cu(m30)(POP)]BF<sub>4</sub>. Data were collected at 173 K on a Bruker APEX-II CCD diffractometer (Mo-K $\alpha$  radiation,  $\lambda = 0.71073$  Å). The structure was solved by direct methods (SHELXS-97) and refined against F<sup>2</sup> using the SHELXL-97 software. The non-hydrogen atoms were refined anisotropically, using weighted full-matrix least-squares on F<sup>2</sup>. The H-atoms were included in calculated positions and treated as riding atoms using SHELXL default parameters. The high residual electronic density results from the disorder in the BF<sub>4</sub> counteranion as well as from the disorder in the flexible

chain subunit of the **m30** ligand. Crystallographic data: formula:  $C_{66}H_{70}CuN_2O_7P_2 \cdot BF_4$  ( $M = 1215.53 \text{ g.mol}^{-1}$ ); yellow crystal,  $0.30 \times 0.25 \times 0.20 \text{ mm}$ ; crystal system: triclinic, space group P-1;  $a = 13.6380(5) \text{ \AA}$ ;  $b = 14.9380(5) \text{ \AA}$ ;  $c = 15.6669(6) \text{ \AA}$ ;  $\alpha = 78.733(1)^\circ$ ;  $\beta = 72.898(1)^\circ$ ;  $\gamma = 83.964(1)$ ;  $V = 2988.29(19) \text{ \AA}^3$ ;  $Z = 2$ ;  $F(000) = 1272$ ; a total of 47180 reflections collected;  $2.04^\circ < \theta < 30.09^\circ$ , 14418 independent reflections with 17435 having  $I > 2\sigma(I)$ ; 634 parameters; Final results :  $R_1(F^2) = 0.1250$ ;  $wR_2(F^2) = 0.3530$ ,  $Goof = 1.484$ . Full data collection parameters and structural data are available as CIF file (Cambridge Crystallographic Data Centre deposition number CCDC 905746).



### Computational studies

The molecular modeling was performed with *Spartan'10* Macintosh Parallel Edition (Wavefunction Inc., USA) at the semi-empirical PM6 level.

For both  $[\text{Cu}(\mathbf{m30})(\text{dppe})]^+$  and  $[\text{Cu}(\mathbf{m30})(\text{POP})]^+$ , the molecular geometry was optimized for the two possible conformers: **A** and **B** for  $[\text{Cu}(\mathbf{m30})(\text{POP})]^+$  / **C** and **D** for  $[\text{Cu}(\mathbf{m30})(\text{dppe})]^+$ . The calculated structures (**m30**: blue, PP ligand: green, Cu: yellow, the H atoms have been omitted for clarity) and the corresponding heat of formation are indicated below.

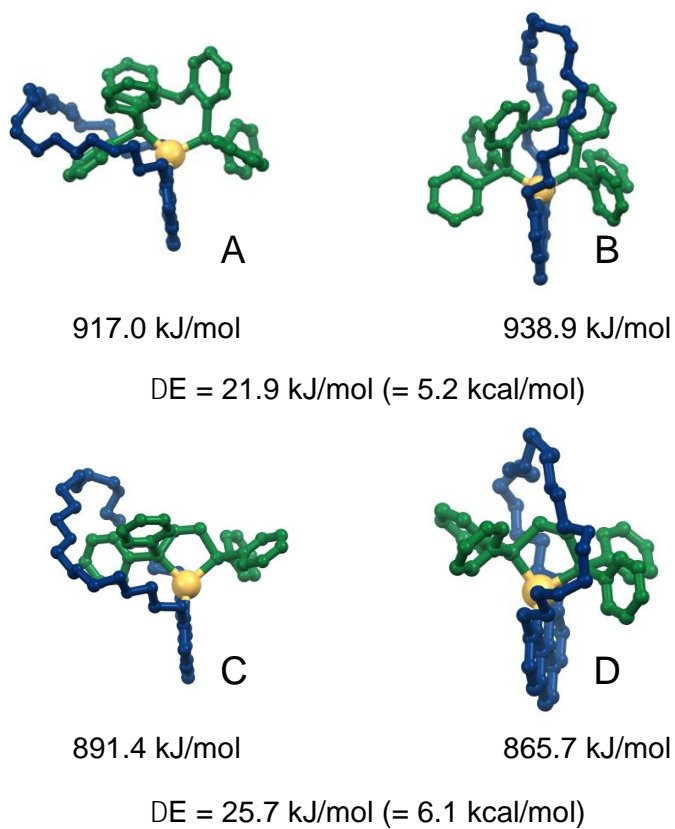

**Fig. S1.** Crystal packing showing the dimeric arrangement of the  $[\text{Cu}(\mathbf{m30})(\text{dppe})]^+$  cations in the crystal lattice.

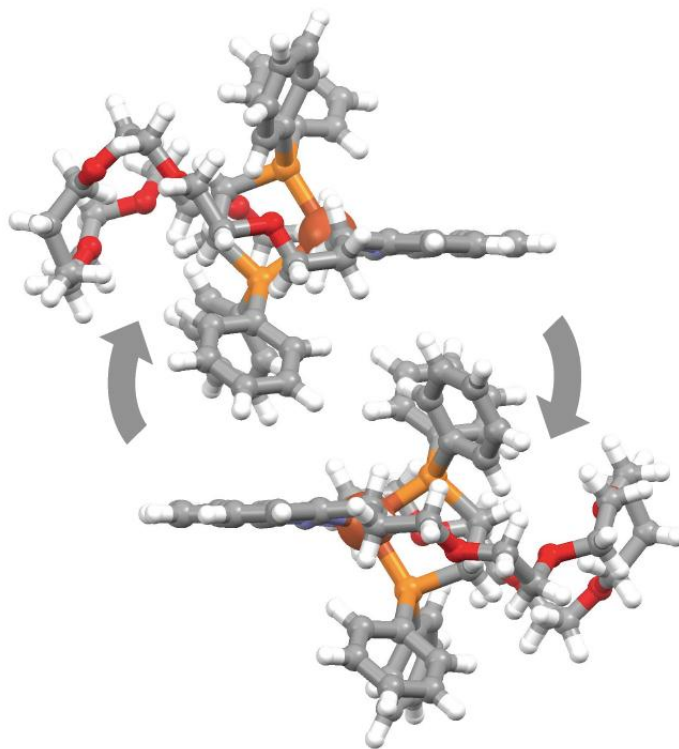

**Fig. S2.**  $^1\text{H}$  NMR spectra (400 MHz) of  $[\text{Cu}(\mathbf{m30})(\text{POP})]\text{BF}_4$  recorded at different temperatures in  $\text{CDCl}_2\text{CDCl}_2$  (left) and  $\text{CD}_2\text{Cl}_2$  (right).

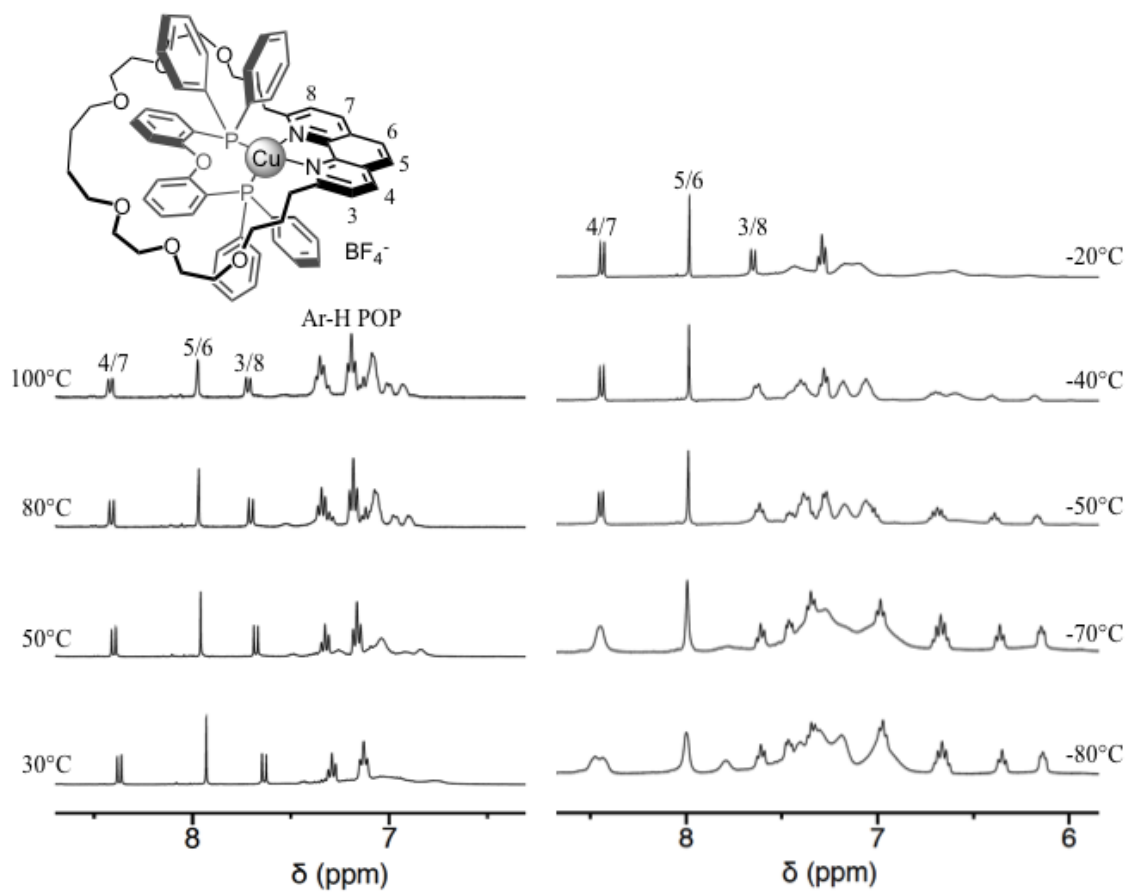

**Fig. S3.**  $^{31}\text{P}$  NMR spectra ( $\text{CD}_2\text{Cl}_2$ , 162 MHz) of  $[\text{Cu}(\mathbf{m30})(\text{POP})]\text{BF}_4$  (left) and  $[\text{Cu}(\mathbf{m30})(\text{dppp})]\text{BF}_4$  (right) recorded at different temperatures.

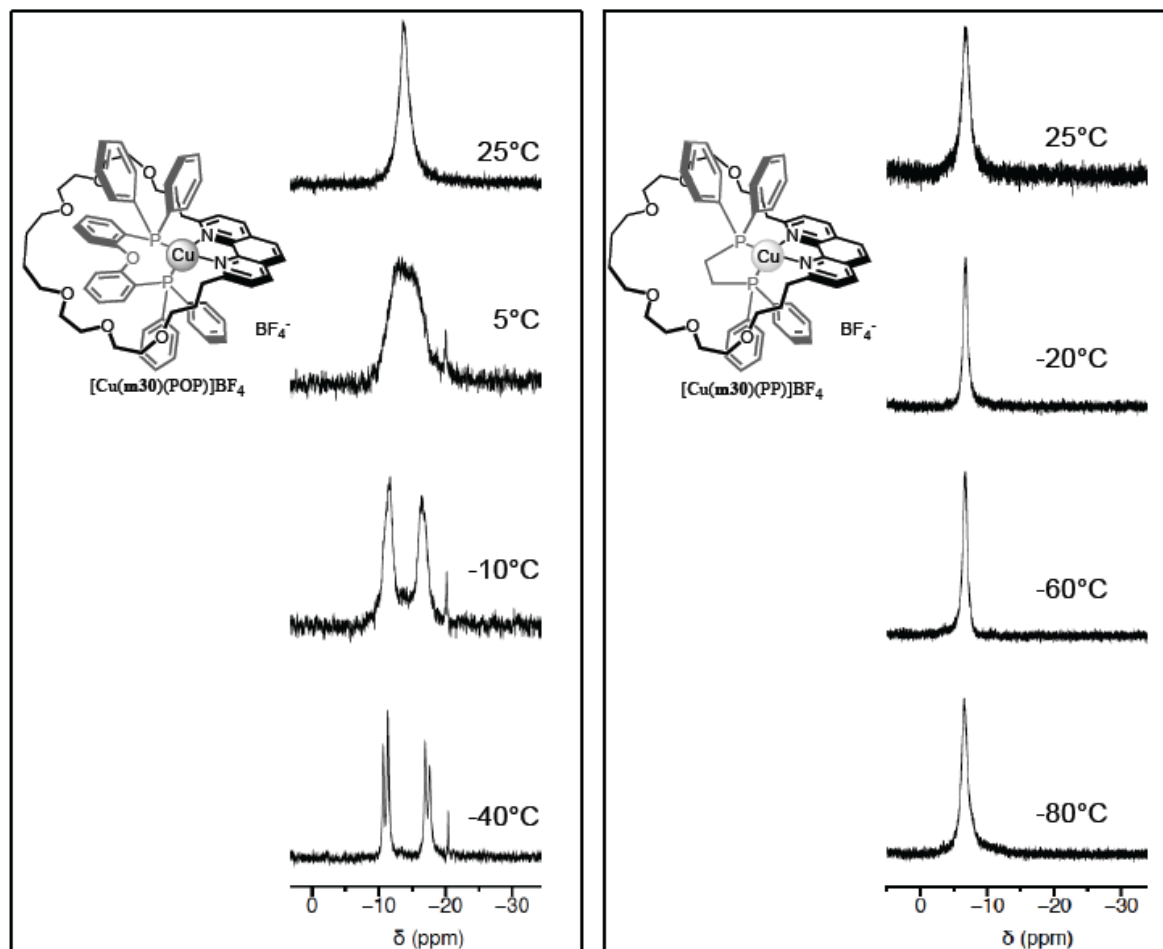

**Fig. S4.** Calculated structures of the different topomers of  $[\text{Cu}(\mathbf{m30})(\text{POP})]^+$  (top) and  $[\text{Cu}(\mathbf{m30})(\text{dppe})]^+$  (bottom);  $\mathbf{m30}$ : blue, PP ligand: green, Cu: yellow; the H atoms have been omitted for clarity. A potential energy diagram is proposed to explain the dynamic exchange between topomers, *i.e.*, topomerization, evidenced for  $[\text{Cu}(\mathbf{m30})(\text{POP})]\text{BF}_4$  by the variable temperature  $^{31}\text{P}$  and  $^1\text{H}$  NMR studies. In the case of  $[\text{Cu}(\mathbf{m30})(\text{dppe})]\text{BF}_4$ , only topomer **D** was detected and no dynamic exchange was evidenced.

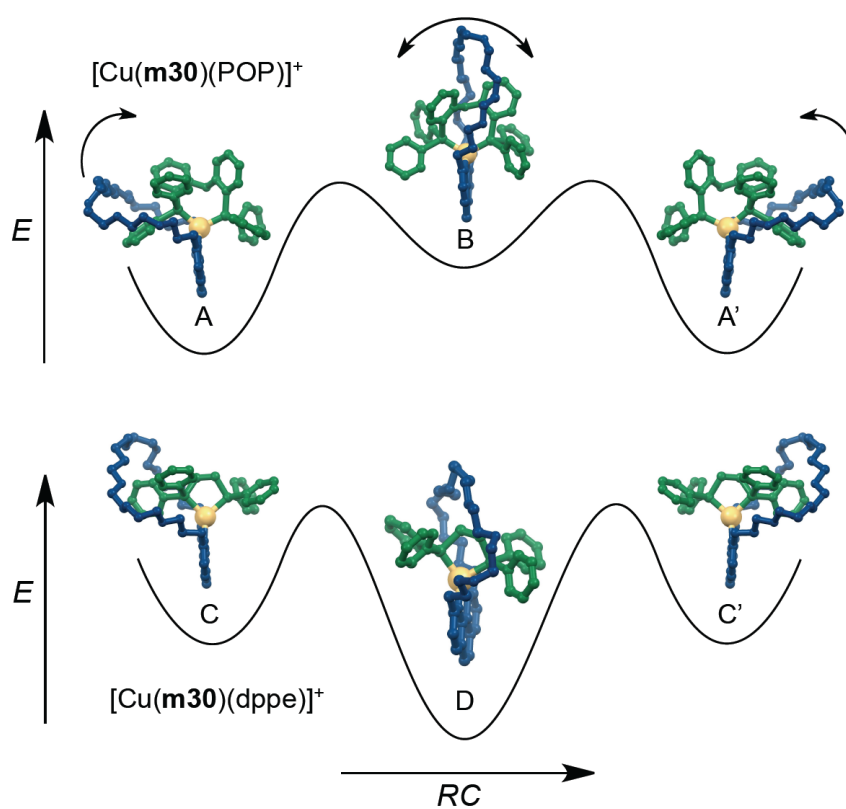

Supplement: c2cc37724a.pdf [file c2cc37724a.pdf]
